# Supplementary material for: Switched-capacitor-convertors based on fractal design for output power management of triboelectric nanogenerator
Source: PubMed Central journal article supplement (PMC7171113; doi:10.1038/s41467-020-15373-y), 2020-04-20
Supplement: 41467_2020_15373_MOESM3_ESM.pdf [file 41467_2020_15373_MOESM3_ESM.pdf]

## **Description of Additional Supplementary Files**

File Name: Supplementary Movie 1

Description: The maximum output charge of TENG with FSCC power management.

File Name: Supplementary Movie 2

Description: Demonstration of lighting LEDs by FSCC power management with pulse output.

File Name: Supplementary Movie 3

Description: Demonstration of driving buzzer by FSCC power management with pulse output.

File Name: Supplementary Movie 4

Description: Driving digital vernier caliper continuously by FSCC power management with constant output.

File Name: Supplementary Movie 5

Description: Driving temperature hygrometer continuously by FSCC power management with constant output.
